# Supplementary material
Source: MDPI journal article supplement (https://www.mdpi.com/2673-6500/4/1/2)
Supplement: s1 [file s1]

Archive with 4 entries (4 files):
- t_FigureS1.pdf
- t_TableS1.pdf
- t_TableS2.pdf
- t_TableS3.pdf
