# Supplementary material
Source: MDPI journal article supplement (https://www.mdpi.com/2673-6500/4/1/2)

## Supplementary Material

**Figure S1.** Whole chromosomes probes (WCP). (A) Homologies of chromosomes 1 to 4 between *Mazama cita* (MCI) and *B. taurus* (BTA). (B) Chromosomal correspondence between *Mazama cita* (BCI), *Subulo gouazoubira* (SGO) and *B. taurus* (BTA).

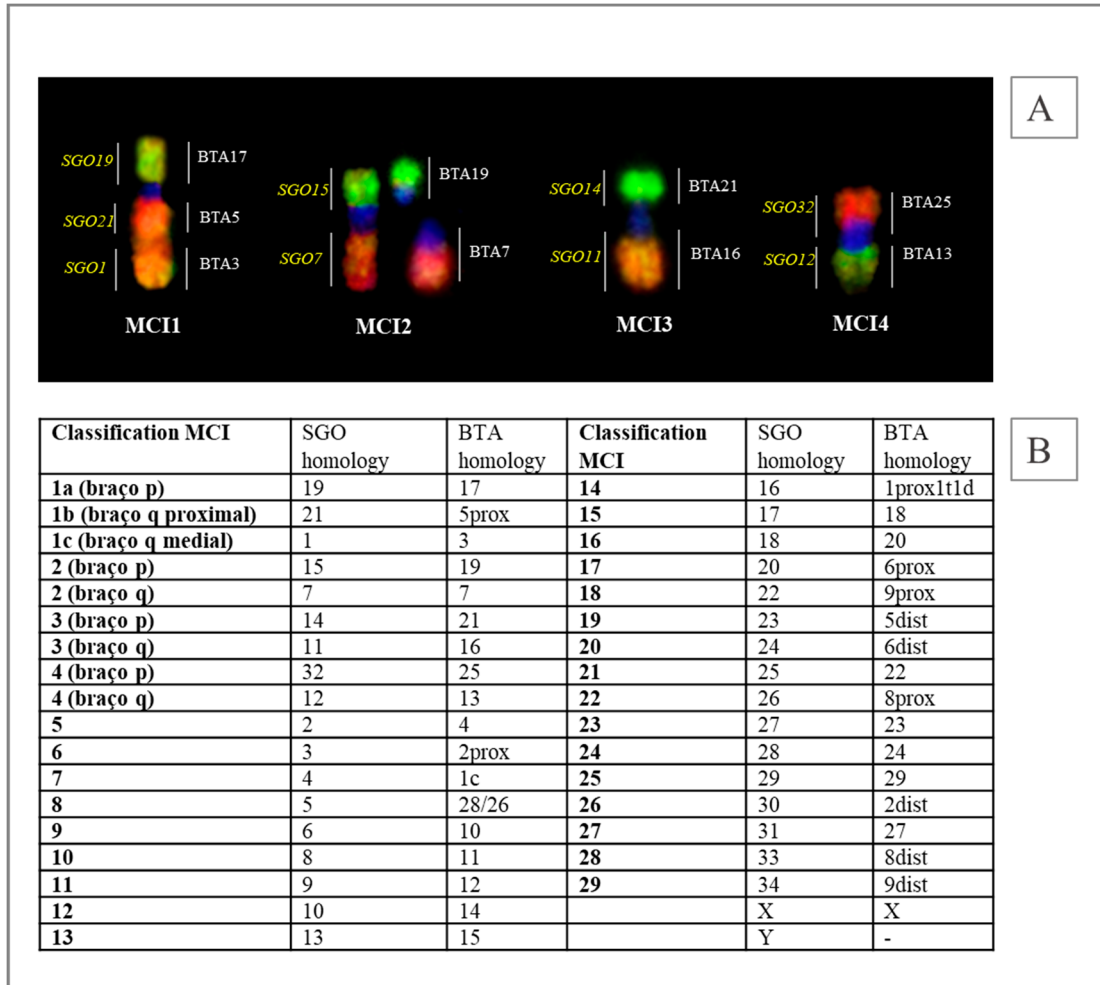

Supplement: s1 [file s1 › t_FigureS1.pdf]
