# Supplementary material
Source: MDPI journal article supplement (https://www.mdpi.com/2673-6500/4/1/2)
Supplement: s1 [file s1 › t_TableS1.pdf]

## Supplementary Material

**Table S1.** Body measurements of a male *Mazama cita* (Osgood, 1912), in centimeters (cm) following Driesch (1976).

| Character    | T410 | Character           | T410 | Character       | T410 |
|--------------|------|---------------------|------|-----------------|------|
| Head length  | 22   | Metacarpus length   | 13.5 | Neck diameter   | 46   |
| Head Width   | 8.5  | Height at shoulders | 56   | Thorax diameter | 60   |
| Ear Length   | 11   | Body length         | 85.5 |                 |      |
| Between eyes | 5.3  | Tail length         | 10   | Mass (in Kg)    | 23   |
| Mandible     | 7.3  | Metatarsus length   | 22   |                 |      |
