# Supplementary material
Source: MDPI journal article supplement (https://www.mdpi.com/2673-6500/4/1/2)
Supplement: s1 [file s1 › t_TableS2.pdf]

## Supplementary Material

**Table S2.** Skull measurements of a male *Mazama cita* (Osgood, 1912), in millimeters (mm) following Driesch (1976).

| Character | T410   | Character | T410   | Character | T410  |
|-----------|--------|-----------|--------|-----------|-------|
| TL        | 189.39 | AK        | 133.97 | GBBP      | 53.72 |
| CBL       | 185.60 | GLN       | 58.74  | GBFM      | 15.29 |
| BL        | 166.29 | SLFL      | 98.54  | HFM       | 16.05 |
| SSL       | 112.69 | OPL       | 81.54  | GNB       | 56.20 |
| PR        | 54.82  | LLP       | 44.83  | LFB       | 60.19 |
| BCA       | 38.34  | LCR       | 58.16  | GBAO      | 69.32 |
| BFA       | 132.43 | LMR       | 33.40  | LBBO      | 52.58 |
| VL        | 91.33  | LPR       | 25.98  | ZB        | 81.27 |
| MFL       | 110.89 | GILO      | 31.13  | GBAN      | 20.13 |
| LN        | 98.57  | GIHO      | 30.37  | GBAP      | 22.49 |
| LR        | 154.82 | GMB       | 57.73  | GPB       | 56.80 |
| LP        | 181.59 | GBOC      | 35.01  | BHPSN     | 62.98 |

TL= total length, CBL= condilobasal length, BL= basal length, SSL= short skull length, PR= premaxilla – postion, BCA= basocranial axis, BFA= basofacial axis, VL= viscerocranium length, MFL= median frontal length, LN= lambda – nasal, LR= lambda – Rhinion, LP= lambda – postion, AK= akrokranium, GLN= greatest length of the nasals, SLFL= short lateral facial length, OPL= oral palatal length, LLP= lateral length of the premaxilla, LCR= length of the cheektooth row, LMR= length of the molar row, LPR= length of the premolar row, GILO= greatest inner length of the orbit, GIHO= greatest inner height of the orbit, GMB= greatest mastoid breadth, GBOC= greatest breadth of the occipital condyles, GBBP= greatest breadth at the bases of the paraoccipital, GBFM= greatest breadth of the foramen magnum, HFM= Height of the foramen magnum: Basion - Opisthion, GNB= Greatest neurocranium breadth, LFB= Least frontal breadth, GBAO= greatest breadth across the orbits, LBBO= least breadth between the orbits, ZB= zygomatic breadth, GBAN= greatest breadth across the nasals, GBAP= greatest breadth across the premaxillae, GPB= greatest palatal breadth, BHPSN= Basion – The highest point of the superior nuchal crest.
