# Supplementary material
Source: MDPI journal article supplement (https://www.mdpi.com/2673-6500/4/1/2)
Supplement: s1 [file s1 › t_TableS3.pdf]

## Supplementary Material

**Table S3.** Bovine BAC clones used for the chromosome X analysis in *Mazama cita* (Osgood, 1912), and their position in the cattle genome (ARS-UCD1.2 Assembly).

| BAC    | Position (Mb) |
|--------|---------------|
| 316D2  | 68.49-68.68   |
| 159O16 | 23.04-23.22   |
| 40H2   | 74.95-75.12   |
| 453C5  | 144.43-144.62 |
| 326C13 | 148.27-148.47 |
